# Supplementary material for: Integrative analysis deciphers the heterogeneity of cancer-associated fibroblast and implications on clinical outcomes in ovarian cancers
Source: PubMed Central journal article supplement — Comput Struct Biotechnol J. 2022 Nov 14;20:6403–11. doi: 10.1016/j.csbj.2022.11.025 (PMC9679440; doi:10.1016/j.csbj.2022.11.025), 2022-11-14
Supplement: mmc1.pdf [file mmc1.pdf]

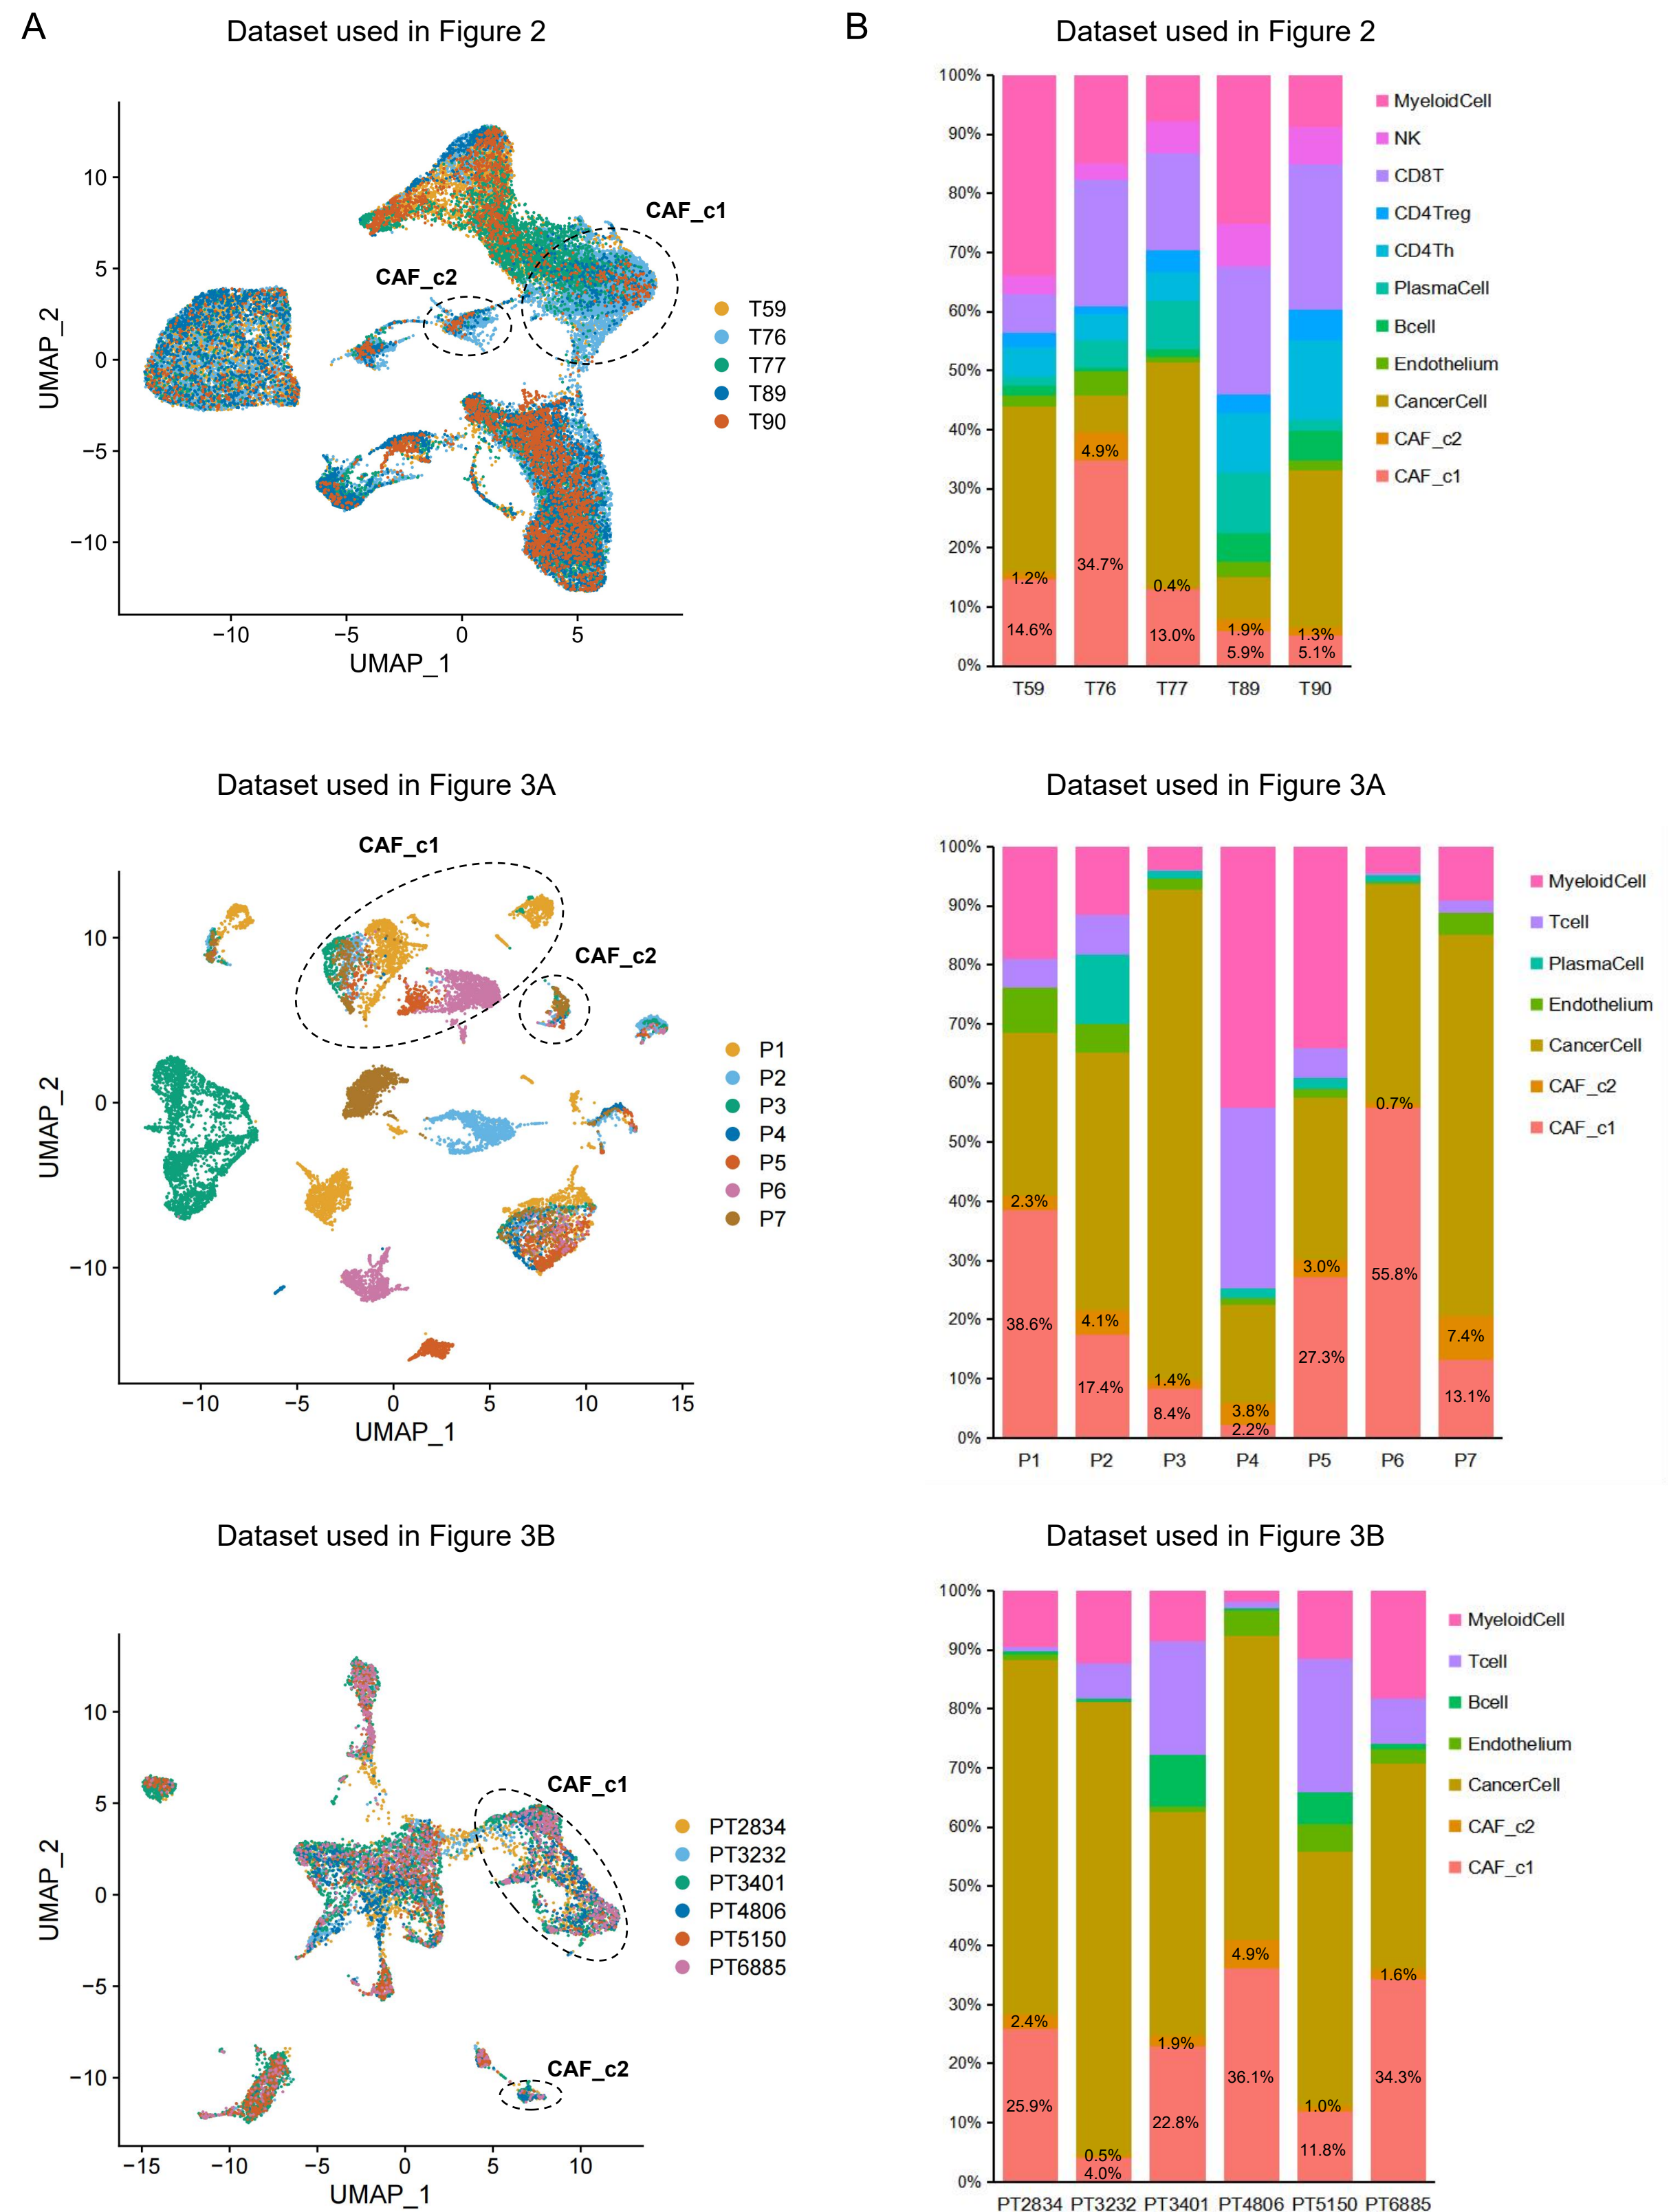

**Figure S1. Identification of two CAF subtypes in individual samples. (A)** Uniform manifold approximation and projection (UMAP) analysis showed the distribution of cell phenotypes in individual samples, the colors indicate different samples. **(B)** The percentage stacking chart of cell proportion in each sample, the colors indicate different cell types.

A

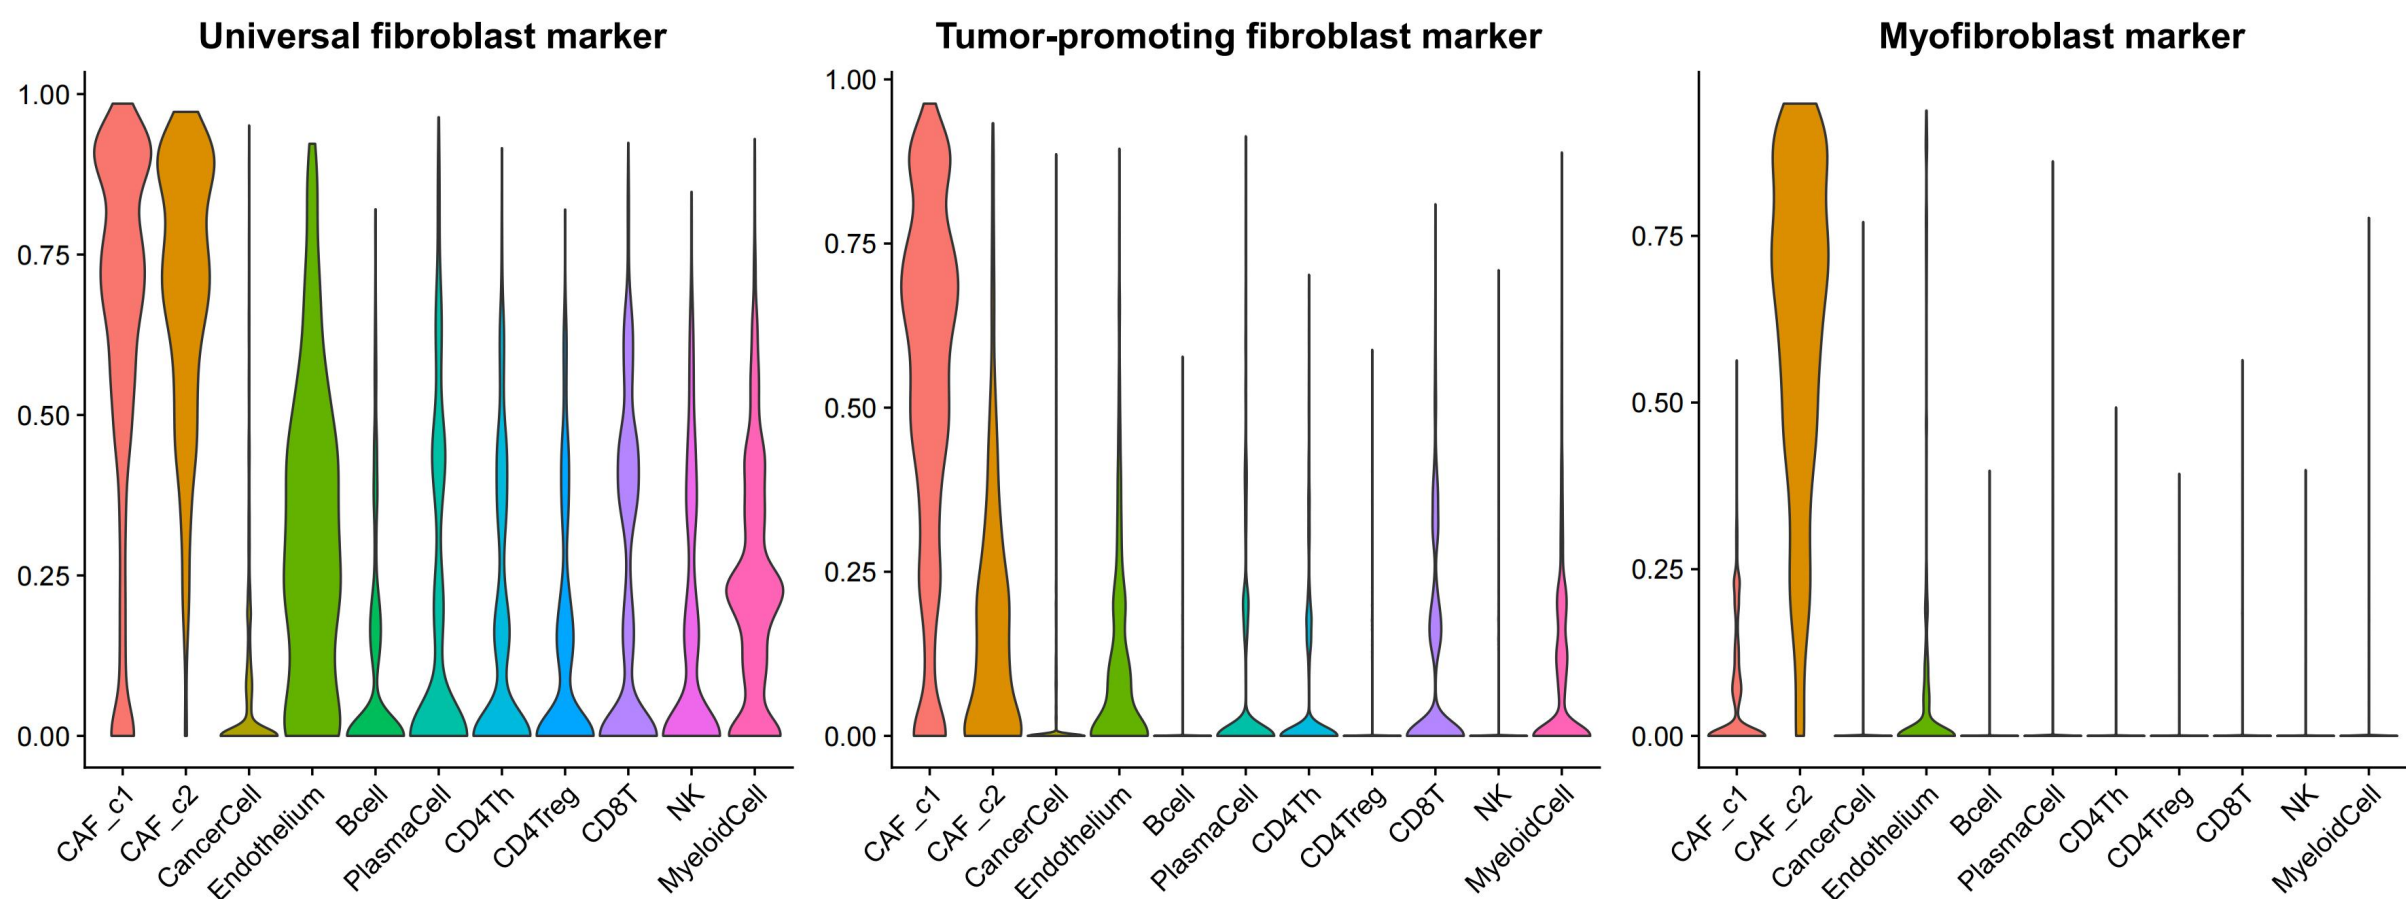

B

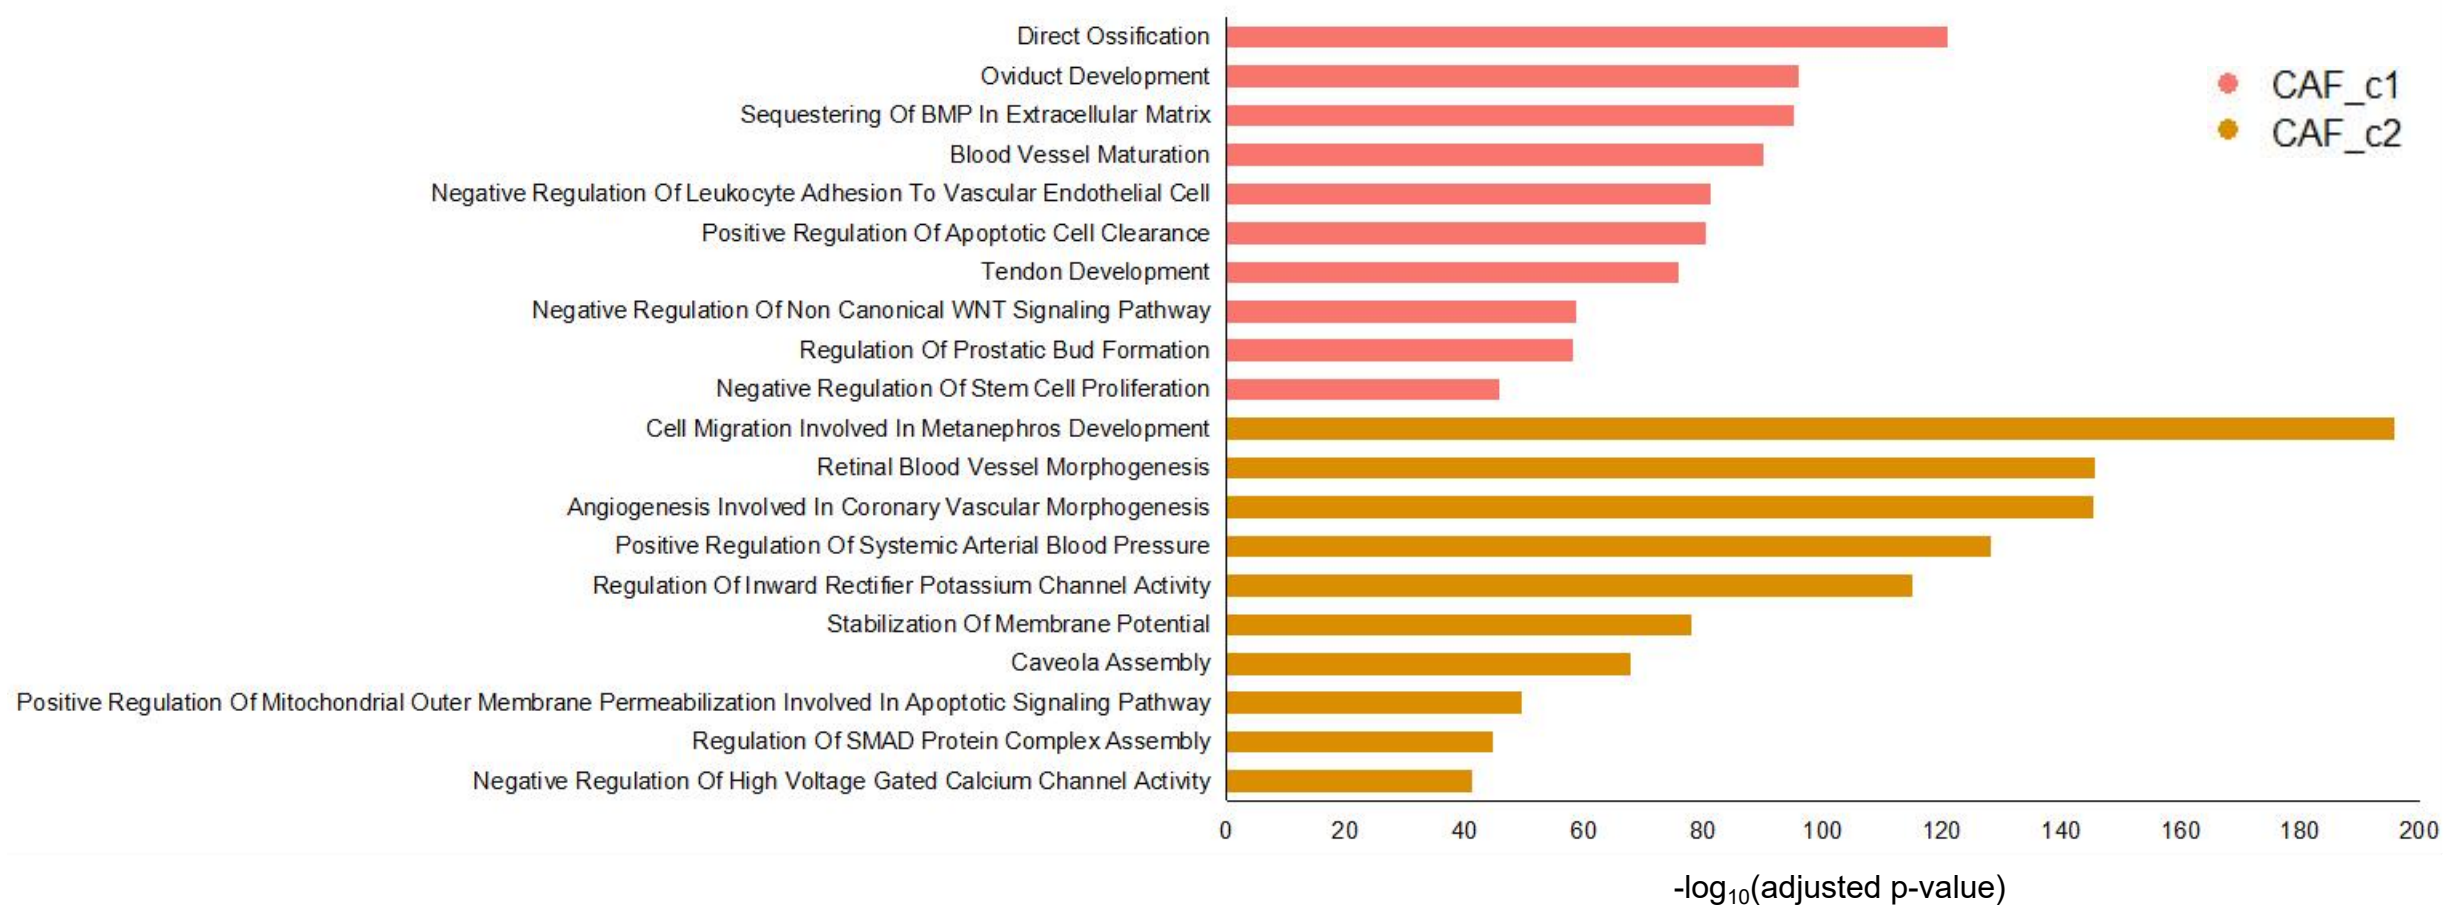

**Figure S2. The annotation and function of two CAF subtypes. (A)** The cell identity score calculated by UCell based on previously reported fibroblast markers. **(B)** Top 10 enriched Gene Ontology (GO) biological processes in CAF\_c1 and CAF\_c2, which was calculated by ssGSEA method in R package “GSVA”. The adjusted p-value was calculated by FindMarkers function in R package “Seurat”.

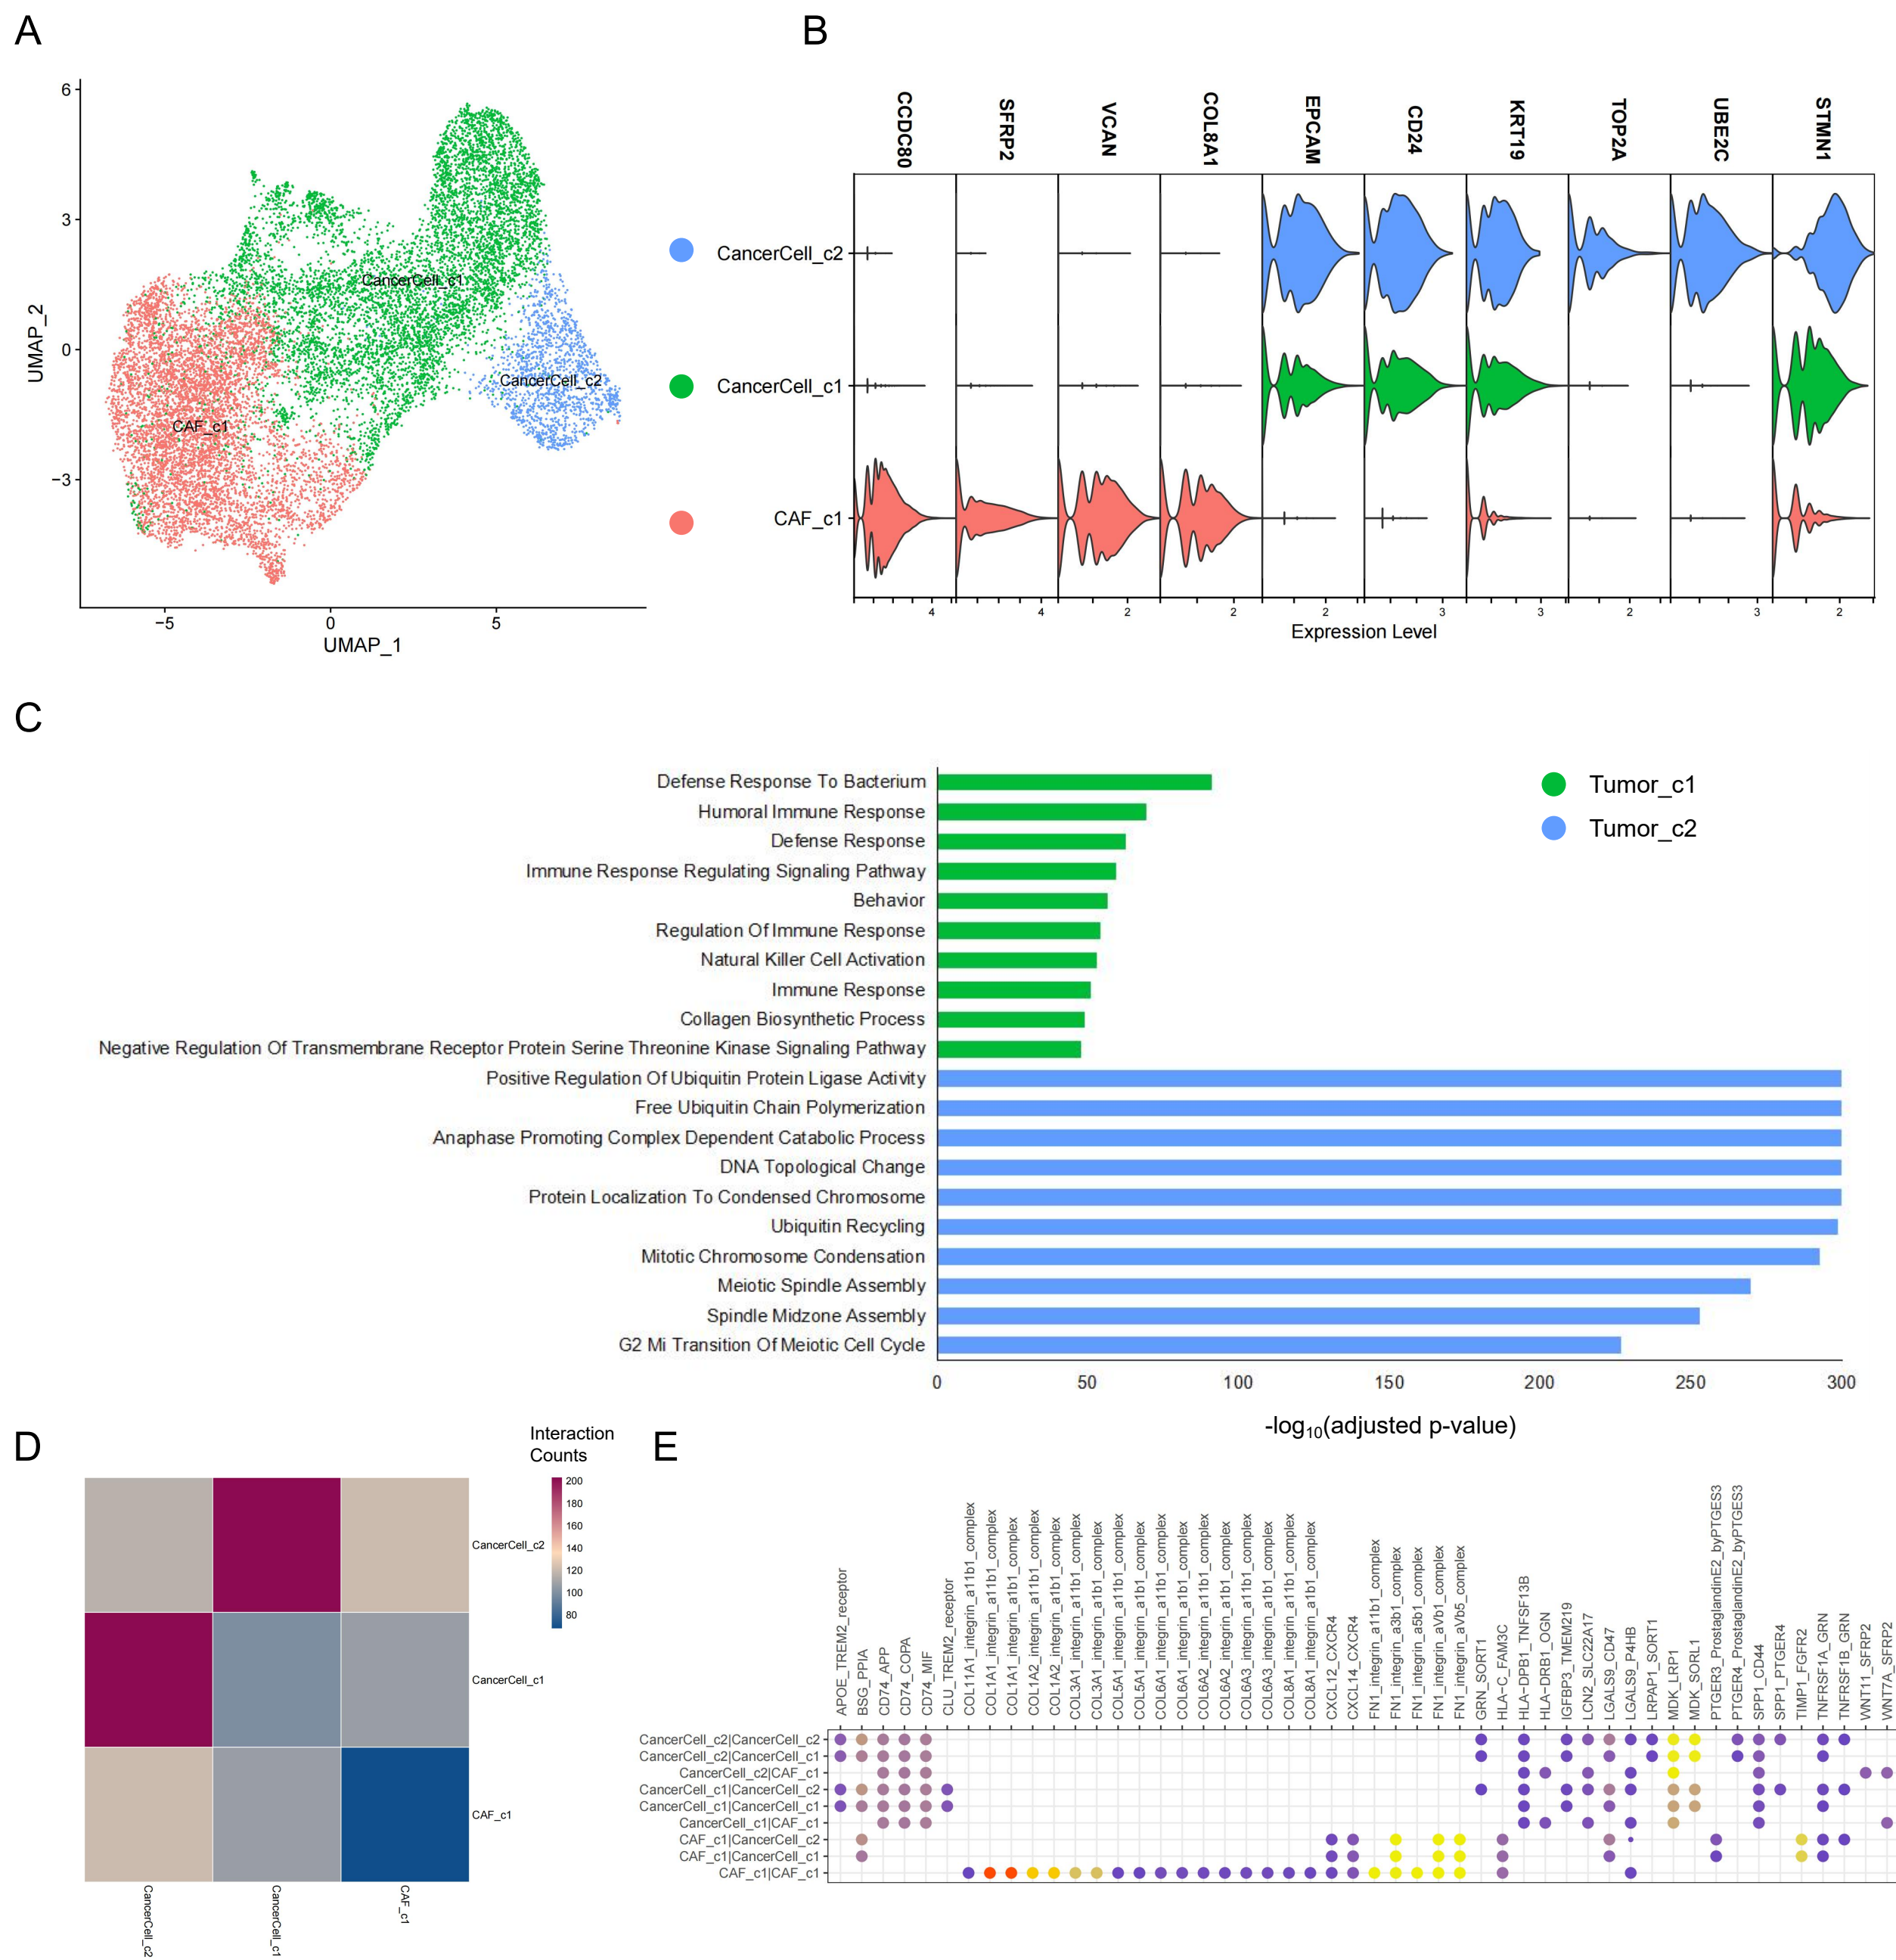

**Figure S3. The annotation and function analysis of cancer cells. (A)** UMAP analysis of CAF\_c1 and cancer cells, in which cancer cells are re-clustered into two subtypes. **(B)** The violin plot of marker genes of CAF\_c1, CancerCell\_c1 and CancerCell\_c2. **(C)** Top 10 enriched Gene Ontology (GO) biological processes in CancerCell\_c1 and CancerCell\_c2, which was calculated by ssGSEA method in R package “GSVA”. The adjusted p-value was calculated by FindMarkers function in R package “Seurat”. **(D)** Heat map depicting the significant interactions among CAF\_c1 and two cancer cell subtypes, the color indicates the number of interactions between two specified TFs. **(E)** Overview of the selected ligand-receptor interactions. P-values (two-tailed permutation test) are indicated by circle size. The means of the average expression level of interacting molecule 1 in cluster 1 and interacting molecule 2 in cluster 2 are indicated by color.

Figure S4

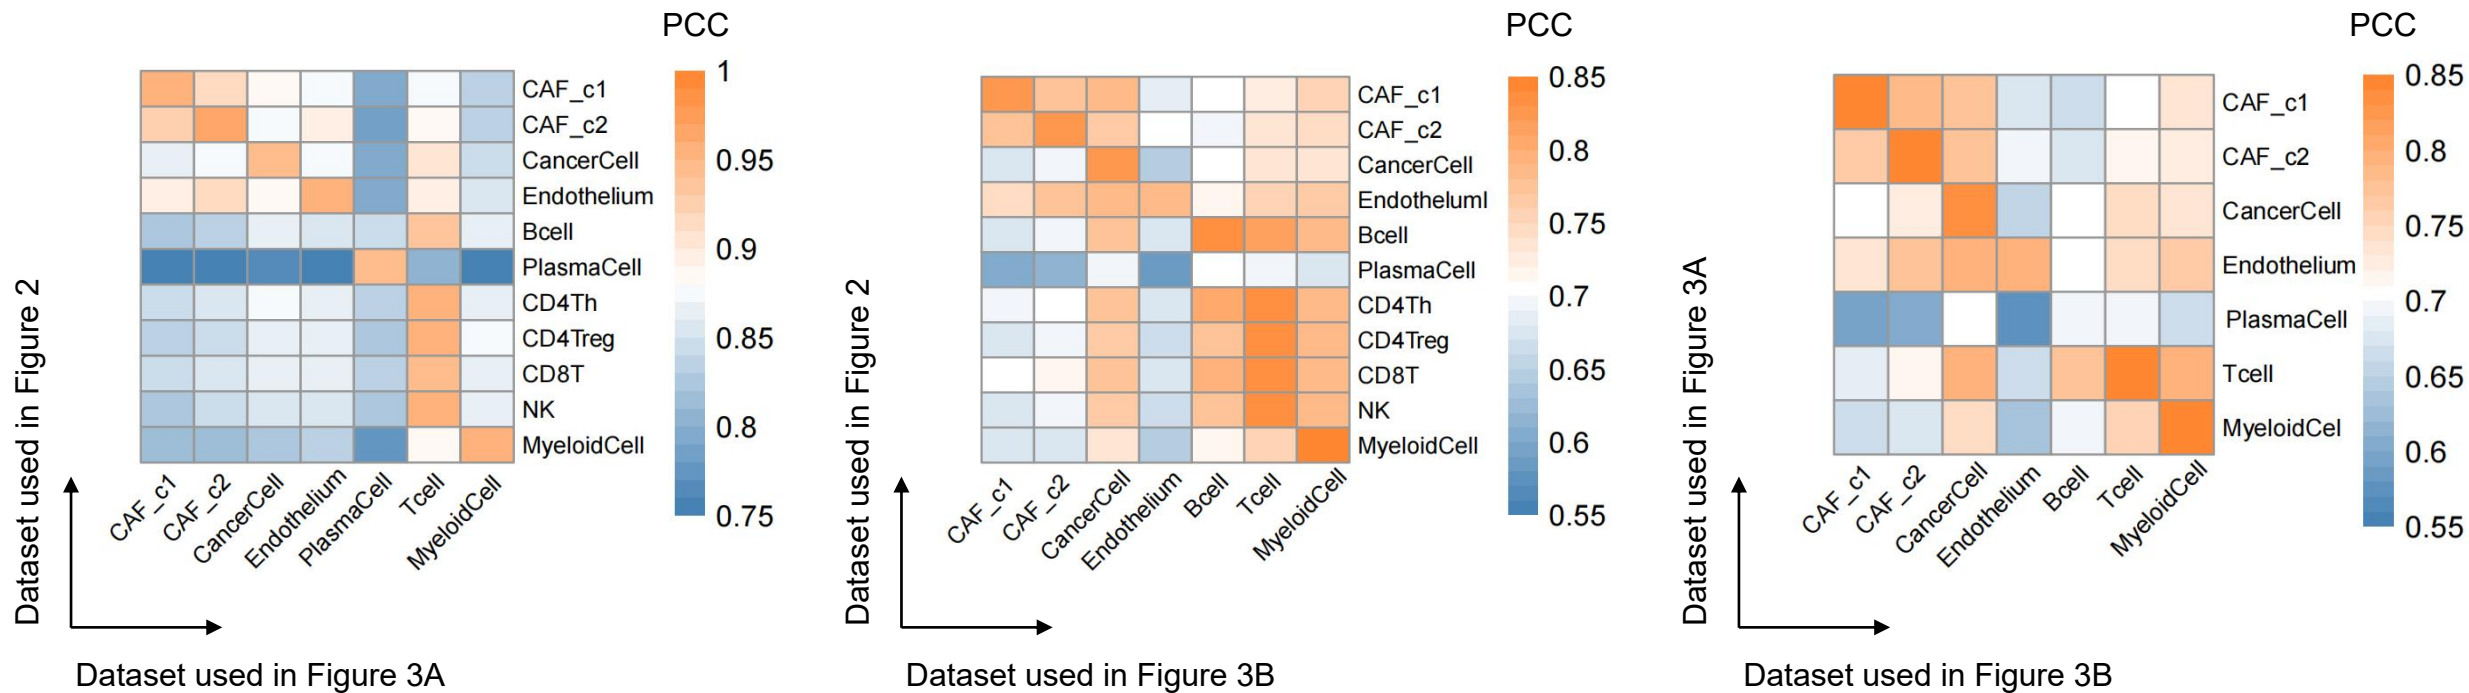

**Figure S4. Heatmaps of the correlation matrixes of gene expression profiles between each two datasets. The color indicates the Pearson correlation coefficient (PCC) of a specified cell type in two independent datasets.**
